# Supplementary material for: Comparative analysis of the cardiomyocyte differentiation potential of induced pluripotent stem cells reprogrammed from human atrial or ventricular fibroblasts
Source: Front Bioeng Biotechnol. 2023 Feb 10;11:1108340. doi: 10.3389/fbioe.2023.1108340 (PMC9950567; doi:10.3389/fbioe.2023.1108340)
Supplement: Supplementary file 2 [file Table3.xlsx]

## Sheet: MapStat_summary
Supplemental Table 3: Bulk-RNAseq mapping quality in our data
Sample name	AiPS1	AiPS2	AiPS3	ViPS1	ViPS2	ViPS3	AiPSCM1	AiPSCM2	AiPSCM3	ViPSCM1	ViPSCM2	ViPSCM3
Total reads	44048206	44582020	53387344	44143382	42809842	48715168	49196356	51819598	51135680	48713444	52716658	48373470
Total mapped reads	42853516	43308918	52014194	43026882	41729790	47434644	47891982	50575664	49871248	47503148	51400420	46998868
Uniquely mapped reads	41693244	42024060	50604788	41884824	40611306	46300154	46615680	49274678	48570228	46213392	50184940	45863196
Multiple mapped reads	1160272	1284858	1409406	1142058	1118484	1134490	1276302	1300986	1301020	1289756	1215480	1135672
Total mapping rate	0.9729	0.9714	0.9743	0.9747	0.9748	0.9737	0.9735	0.976	0.9753	0.9752	0.975	0.9716
Uniquely mapping rate	0.9465	0.9426	0.9479	0.9488	0.9486	0.9504	0.9475	0.9509	0.9498	0.9487	0.952	0.9481
Multiple mapping rate	0.0263	0.0288	0.0264	0.0259	0.0261	0.0233	0.0259	0.0251	0.0254	0.0265	0.0231	0.0235
