# Supplementary material for: Comparative analysis of the cardiomyocyte differentiation potential of induced pluripotent stem cells reprogrammed from human atrial or ventricular fibroblasts
Source: Front Bioeng Biotechnol. 2023 Feb 10;11:1108340. doi: 10.3389/fbioe.2023.1108340 (PMC9950567; doi:10.3389/fbioe.2023.1108340)
Supplement: Supplementary file 7 [file Table6.xlsx]

## Sheet: Sheet1
Supplemental Table 6 : The statistics of 124 differentially-expressed genes comparing between AiPSC-CM and ViPSC-CM
Gene	average expression	fold change: AiPSC-CM vs ViPSC-CM	pVal
A2M	881.29	-1.19604	0.00195312
ACTG2	553.306	-1.20255	0.00195312
ADAMTS7P3	111.997	-1.09126	0.00195312
AHNAK	5863.24	1.04606	0.00195312
APLNR	257.008	3.95658	0.00195312
ARID5A	242.61	1.72266	0.00195312
ATRNL1	196.667	-1.03628	0.00195312
BIN1	766.404	1.13444	0.00195312
BRINP3	167.929	-1.25024	0.00195312
C11orf21	735.044	-1.08624	0.00195312
CACNA1H	566.967	1.2528	0.00195312
CAMK2B	428.97	1.02012	0.00195312
CASQ2	228.934	-1.03567	0.0195312
CCDC80	2380.48	-1.04813	0.00195312
CDC20	267.239	-1.07441	0.00195312
CDH5	103.939	3.48521	0.00195312
CEL	195.859	-1.01984	0.00195312
CEMIP	192.719	-1.45988	0.00195312
CLDN1	118.603	-1.02367	0.00195312
CLSTN2	858.63	-1.10132	0.00195312
COBL	769.243	1.35276	0.00195312
COL21A1	789.329	1.33319	0.00195312
COL23A1	105.475	1.18508	0.00195312
COL8A1	362.852	-1.72192	0.00195312
CREB5	462.745	1.09048	0.00195312
DAB1	484.43	1.02812	0.00195312
DCN	147.705	-1.06291	0.00195312
DNAJC5G	164.883	1.06896	0.00195312
DRD1	296.457	-1.19602	0.00195312
DSC3	390.773	-1.54536	0.00195312
DTX4	177.483	-1.02731	0.00195312
EGFL7	259.528	1.28013	0.00195312
EGR1	597.685	1.32673	0.00195312
ENG	100.763	1.05934	0.00195312
EPHA4	1028.65	-1.06154	0.00195312
ERBB3	225.982	1.41169	0.00195312
ESCO2	120.255	-1.09105	0.00195312
ESPL1	182.387	-1.02459	0.00195312
ESRP1	201.983	-1.39593	0.00195312
FAM110C	173.497	-1.15606	0.00195312
FAM20A	353.783	1.08006	0.00195312
FAM83D	141.558	-1.20443	0.00195312
FGF18	296.629	1.28699	0.00195312
FGF5	224.514	1.84324	0.00195312
FOXC1	142.537	-1.28803	0.00195312
FREM2	906.84	1.34278	0.00195312
FZD7	492.83	-1.73038	0.00195312
GABRB2	325.403	-1.50993	0.00195312
GABRE	226.698	1.02672	0.00195312
GDF15	206.211	-1.03867	0.00195312
GNG11	131.505	2.4623	0.00195312
GRK5	521.042	-1.04197	0.00195312
GSDMB	136.963	1.23775	0.00195312
H19	3429.7	-1.55818	0.00195312
HAPLN1	942.986	-1.03796	0.00195312
HECW2	1256.59	1.05041	0.00195312
HSPA1A	407.526	1.13302	0.00195312
IGF2	309.109	-1.24326	0.00195312
IL17D	133.427	1.02009	0.00195312
ISL1	163.835	-1.12793	0.00195312
ITGA8	159.409	1.39773	0.00195312
JAK2	567.33	1.14321	0.00195312
KCNK3	422.555	-1.52059	0.00195312
KCNQ5	656.179	1.30612	0.00195312
KCNV1	228.971	2.71615	0.00195312
KCTD12	3710.6	1.54745	0.00195312
KDR	919.723	1.5596	0.00195312
KIF14	124.148	-1.05479	0.00195312
KRT19	740.99	1.01991	0.00195312
LGALS3	392.84	1.15581	0.00195312
LOXL4	146.255	1.74045	0.00195312
LPL	489.342	-1.52503	0.00195312
MAMDC2	137.017	-1.01841	0.00195312
MEG3	2732.2	-2.05025	0.00195312
MYH11	318.567	-1.02779	0.00195312
NFIX	111.474	1.24833	0.00195312
NMRK2	192.718	-1.81091	0.00195312
NPR3	158.966	-3.72667	0.00195312
NR2F2	133.228	-1.16697	0.00195312
NR4A1	260.916	1.14378	0.00195312
NTN1	341.765	-1.0066	0.0195312
NTN4	242.832	-1.18922	0.00195312
OLFML3	368.983	1.19559	0.00195312
PAPPA2	221.032	-1.07164	0.00195312
PEG10	2013.97	1.46253	0.00195312
PLAT	206.31	1.80796	0.00195312
PLEKHA4	313.994	1.03872	0.00195312
PLEKHG1	247.687	1.34031	0.00195312
PLEKHG5	1937.47	-1.0152	0.00195312
PMEL	2057.04	-2.25648	0.00195312
PPL	796.754	1.1146	0.00195312
PRKCA	917.305	1.12779	0.00195312
PRRX1	902.833	-1.35818	0.00195312
RAB3A	178.002	-1.13427	0.00195312
RN7SL2	644.775	1.24807	0.00195312
ROBO2	130.078	1.05958	0.00195312
RRM2	380.866	-1.03964	0.00195312
RSPO3	126.268	1.49425	0.00195312
SEC14L5	394.757	-1.7211	0.00195312
SERPINI1	268.511	1.11438	0.00195312
SLC27A3	127.93	1.13641	0.00195312
SLC45A2	184.763	-1.01595	0.00195312
SLC6A2	152.501	1.08153	0.00195312
SLC6A6	762.916	-1.1807	0.00195312
SORCS2	158.988	1.47586	0.00195312
SPOCK1	1064.94	2.0051	0.00195312
SPON1	393.94	2.51877	0.00195312
ST6GALNAC5	231.755	-1.02703	0.00195312
TCAP	2847.23	1.14159	0.00195312
TENM3	614.227	1.17318	0.00195312
TENM4	492.975	1.19901	0.00195312
TFPI	113.48	1.49618	0.00195312
TFPI2	907.614	3.19774	0.00195312
TM4SF1	228.728	1.31778	0.00195312
TNC	365.45	-1.2305	0.00195312
TNFRSF19	1585.99	1.23807	0.00195312
TNS2	364.531	1.14831	0.00195312
TOP2A	1199.09	-1.01607	0.00195312
TRIM9	224.28	1.75051	0.00195312
TROAP	105.388	-1.08521	0.00195312
VAT1L	459.877	-1.30216	0.0195312
VSTM2L	854.005	1.05267	0.00195312
VWC2	225.659	1.10309	0.00195312
ZFP3	120.474	1.37635	0.00195312
