# Supplementary material for: Comparative analysis of the cardiomyocyte differentiation potential of induced pluripotent stem cells reprogrammed from human atrial or ventricular fibroblasts
Source: Front Bioeng Biotechnol. 2023 Feb 10;11:1108340. doi: 10.3389/fbioe.2023.1108340 (PMC9950567; doi:10.3389/fbioe.2023.1108340)
Supplement: Supplementary file 8 [file Table4.xlsx]

## Sheet: Sheet1
Supplemental Table 4: the data origin and characteristics of the iPSC and iPSC-CM cell lines, in which Bulk-RNAseq data were integrated and analyzed
Cell line	Cell type	Origin of hiPSC	Group	GEO data number	Pubmed ID	hiPSC-CM #day collecting	Other protocol notes
19004_D86_1_S121	iPSC-CM	Skin biopsy	S-D90iPSC-CM	https://www.ncbi.nlm.nih.gov/geo/query/acc.cgi?acc=GSE187308	PMID: 35931076	Day 86	N/A
19004_D86_2_S123	iPSC-CM	Skin biopsy	S-D90iPSC-CM	https://www.ncbi.nlm.nih.gov/geo/query/acc.cgi?acc=GSE187308	PMID: 35931076	Day 86	N/A
19004_D90_S120	iPSC-CM	Skin biopsy	S-D90iPSC-CM	https://www.ncbi.nlm.nih.gov/geo/query/acc.cgi?acc=GSE187308	PMID: 35931076	Day 90	N/A
MYL2_D86_S122	iPSC-CM	HEK293 (kidney)	K-D90iPSC-CM	https://www.ncbi.nlm.nih.gov/geo/query/acc.cgi?acc=GSE187308	PMID: 35931076	Day 86	N/A
i12C-CM_rep1_RNA-seq	iPSC-CM	dermal fibroblasts (skin)	S-D30iPSC-CM	https://www.ncbi.nlm.nih.gov/geo/query/acc.cgi?acc=GSE94267	PMID: 29203658	Day 30	N/A
i12C-CM_rep2_RNA-seq	iPSC-CM	dermal fibroblasts (skin)	S-D30iPSC-CM	https://www.ncbi.nlm.nih.gov/geo/query/acc.cgi?acc=GSE94267	PMID: 29203658	Day 30	N/A
i12J-CM_rep1_RNA-seq	iPSC-CM	dermal fibroblasts (skin)	S-D30iPSC-CM	https://www.ncbi.nlm.nih.gov/geo/query/acc.cgi?acc=GSE94267	PMID: 29203658	Day 30	N/A
i12J-CM_rep2_RNA-seq	iPSC-CM	dermal fibroblasts (skin)	S-D30iPSC-CM	https://www.ncbi.nlm.nih.gov/geo/query/acc.cgi?acc=GSE94267	PMID: 29203658	Day 30	N/A
AiPSCM1	iPSC-CM	atrial cardiomyocyte	AiPSC-CM
AiPSCM2	iPSC-CM	atrial cardiomyocyte	AiPSC-CM
AiPSCM3	iPSC-CM	atrial cardiomyocyte	AiPSC-CM
ViPSCM1	iPSC-CM	ventricle cardiomyocyte	ViPSC-CM
ViPSCM2	iPSC-CM	ventricle cardiomyocyte	ViPSC-CM
ViPSCM3	iPSC-CM	ventricle cardiomyocyte	ViPSC-CM
i12C-iPS_rep1	iPSC	dermal fibroblasts (skin)	SiPSC	https://www.ncbi.nlm.nih.gov/geo/query/acc.cgi?acc=GSE94267	PMID: 29203658	N/A	Day20-25 passage
i12C-iPS_rep2	iPSC	dermal fibroblasts (skin)	SiPSC	https://www.ncbi.nlm.nih.gov/geo/query/acc.cgi?acc=GSE94267	PMID: 29203658	N/A	Day20-25 passage
i12J-iPS_rep1	iPSC	dermal fibroblasts (skin)	SiPSC	https://www.ncbi.nlm.nih.gov/geo/query/acc.cgi?acc=GSE94267	PMID: 29203658	N/A	Day20-25 passage
i12J-iPS_rep2	iPSC	dermal fibroblasts (skin)	SiPSC	https://www.ncbi.nlm.nih.gov/geo/query/acc.cgi?acc=GSE94267	PMID: 29203658	N/A	Day20-25 passage
AiPS1	iPSC	atrial cardiomyocyte	AiPSC
AiPS2	iPSC	atrial cardiomyocyte	AiPSC
AiPS3	iPSC	atrial cardiomyocyte	AiPSC
ViPS1	iPSC	ventricle cardiomyocyte	ViPSC
ViPS2	iPSC	ventricle cardiomyocyte	ViPSC
ViPS3	iPSC	ventricle cardiomyocyte	ViPSC
