# Supplementary material for: Comparative analysis of the cardiomyocyte differentiation potential of induced pluripotent stem cells reprogrammed from human atrial or ventricular fibroblasts
Source: Front Bioeng Biotechnol. 2023 Feb 10;11:1108340. doi: 10.3389/fbioe.2023.1108340 (PMC9950567; doi:10.3389/fbioe.2023.1108340)
Supplement: Supplementary file 9 [file Table5.xlsx]

## Sheet: Sheet1
Supplemental Table 5: The statistics of 1081 differentially-expressed genes comparing between cardiac-tissue-derived iPSC-CM (AiPSC-CM/ViPSC-CM) and skin-tissue-derived iPSC-CM (S-D30iPSC-CM/ S-D90iPSC-CM)
Gene	average expression	fold change: A/ViPSC-CM vs S-D30/90iPSC-CM	pVal
A1BG-AS1	127.084	-2.09042	0.0011655
A2M	7359.5	-3.87298	0.0011655
A2M-AS1	139.009	-1.16532	0.00815851
AAMDC	447.138	-2.05741	0.0011655
ABCA1	809.806	1.12659	0.0221445
ABCC4	167.041	-1.0545	0.0011655
ABCC6	175.066	-2.19242	0.004662
ABCD1	712.417	1.62072	0.0011655
ABCG1	333.8	1.97819	0.0011655
ABHD17A	1333.05	1.00238	0.0011655
ABHD6	139.243	-1.49954	0.0011655
AC021078.1	166.628	1.79537	0.004662
AC093323.1	180.932	1.42447	0.004662
ACACA	1354.91	-1.05621	0.0011655
ACACB	2065.09	-1.22931	0.0011655
ACAT2	467.093	-1.17489	0.0011655
ACKR3	121.615	-2.29576	0.002331
ACO2	8959.37	-1.12077	0.0011655
ACOT13	1075.67	-1.16695	0.00815851
ACOX2	491.098	-1.86022	0.0011655
ACTA2	9584.29	-1.5005	0.034965
ADAMTS10	303.564	1.30219	0.0221445
ADAMTS14	516.163	-3.29047	0.00815851
ADAMTS3	182.956	-1.46044	0.0011655
ADAMTS9	2871.44	-1.39711	0.0011655
ADAMTSL1	924.757	-2.16653	0.0011655
ADCY1	349.681	-1.38463	0.0011655
ADCY5	9121.97	-1.00065	0.0011655
ADD2	628.263	-2.1214	0.0011655
ADHFE1	198.363	-1.26629	0.0011655
ADI1	1252.1	-1.17507	0.0011655
ADRB2	148.455	-2.16923	0.0011655
AGAP6	149.733	1.32918	0.004662
AGPAT1	1638	-1.08131	0.0011655
AGRN	4660.66	1.20948	0.0011655
AHDC1	1765.74	1.32423	0.0011655
AHNAK	14982.4	-1.95919	0.0011655
AHR	186.456	-1.57233	0.0011655
AIF1L	1447.52	-1.79729	0.034965
AKAP13	6611.27	-1.03884	0.0011655
AKAP9	1196.35	-1.01839	0.0011655
AKR1A1	1520.5	-1.16494	0.0011655
AL118506.1	113.268	1.50587	0.0011655
ALAS2	240.578	-3.9217	0.0011655
ALDH16A1	224.532	1.15701	0.0011655
ALDOC	2812.27	-3.81136	0.0011655
ALG12	321.972	-1.0285	0.0011655
ALMS1	478.264	-1.035	0.0011655
AMZ2P1	158.281	-1.68338	0.0011655
ANAPC10	108.37	-1.41834	0.0011655
ANAPC15	276.141	-1.94147	0.0011655
ANKH	1872.6	-1.17398	0.0221445
ANKRD9	1435.2	1.02192	0.0011655
ANXA2P2	116.98	-4.33555	0.0011655
AP5B1	270.517	1.03167	0.0011655
APBA1	183.789	-1.88113	0.013986
APCDD1	879.186	-1.35373	0.00815851
APLNR	126.816	4.07741	0.00815851
APOBEC2	2625.73	-1.35627	0.004662
APOE	11380.8	1.84111	0.002331
AQP1	3576.91	-2.49221	0.0011655
AR	103.602	-1.57533	0.034965
ARG2	514.052	-2.42679	0.0011655
ARHGAP31	3042.53	-1.71551	0.0011655
ARHGAP4	138.227	1.88751	0.0011655
ARHGEF16	130.522	1.57552	0.00815851
ARHGEF3	586.131	-1.63375	0.013986
ARHGEF37	373.648	-1.19826	0.034965
ARID3A	1232.7	1.57329	0.0011655
ARL2BP	478.092	-4.05987	0.0011655
ARPC1B	160.421	-4.03755	0.034965
ARRDC4	417.965	-2.86725	0.0011655
ARSA	618.339	1.15427	0.0011655
ASAH2B	141.452	1.26004	0.0011655
ASB15	168.829	-11.0862	0.032634
ASPM	356.005	-1.02038	0.00815851
ASS1	1035.23	1.05704	0.0221445
ASTN1	260.44	-5.45265	0.0011655
ATOH8	134.445	-2.57923	0.034965
ATP6V0C	151.652	6.62795	0.0011655
ATP8A1	389.438	1.59956	0.0011655
ATRIP	109.382	1.60018	0.002331
B2M	4359.94	-1.2582	0.002331
B3GALNT2	400.435	-1.05313	0.013986
B3GALT2	600.809	-3.34971	0.0011655
B3GALT6	733.124	1.36725	0.0011655
B4GALNT4	245.472	1.78875	0.0011655
B4GALT4	432.241	-1.05208	0.0011655
BAIAP2L1	192.121	1.30078	0.0011655
BBC3	368.024	1.57128	0.0011655
BBS12	139.778	-1.30624	0.002331
BBS9	421.851	-1.85194	0.0011655
BCDIN3D	105.877	-1.04119	0.0011655
BCO2	302.941	-2.141	0.034965
BCYRN1	109.991	-6.67286	0.020979
BHLHB9	196.053	1.70626	0.0011655
BIN1	456.053	2.01182	0.00815851
BIN3	242.141	-1.06375	0.0011655
BIRC6	2314.1	-1.4082	0.0011655
BMP7	4411.06	-1.2906	0.004662
BPHL	342.207	-1.06004	0.0011655
BRD4	2135.53	1.05185	0.0011655
BRF2	221.586	-1.03902	0.0011655
BRINP2	118.765	-8.17452	0.011655
BRINP3	450.826	-2.04565	0.00815851
BSPRY	164.775	1.18188	0.00815851
C12orf57	645.546	-1.68011	0.0011655
C16orf58	987.536	-1.52297	0.0011655
C1orf105	459.595	-2.51516	0.0011655
C1orf226	194.117	-1.09617	0.004662
C1orf35	247.391	1.27322	0.0011655
C21orf58	215.816	1.10394	0.0011655
C4orf48	270.589	2.52124	0.0011655
C8orf82	553.935	1.02449	0.0011655
C8orf88	149.236	-1.20725	0.034965
CA14	269.016	-1.87812	0.034965
CACNA1G	740.357	-2.1427	0.0011655
CACNB2	1655.86	-1.09602	0.034965
CALCOCO2	805.556	-1.51921	0.034965
CALR	11148.6	-1.34088	0.0011655
CAMK1	132.022	-1.30226	0.0221445
CAMSAP3	134.965	1.47429	0.0011655
CAPN15	531.976	1.24927	0.0011655
CASP7	226.662	-1.79598	0.034965
CASQ1	491.811	-1.19399	0.00815851
CASQ2	4683.09	-5.21462	0.002331
CAV1	1842.57	-2.82247	0.0011655
CAV3	149.039	-5.0845	0.0011655
CBX2	301.525	1.11508	0.0011655
CBY1	384.224	-1.21788	0.0011655
CCBE1	175.183	-3.14591	0.0011655
CCDC107	256.715	-1.37763	0.0011655
CCDC117	557.37	1.00716	0.034965
CCDC120	139.63	1.33591	0.0011655
CCDC144NL-AS1	104.966	-4.17752	0.0011655
CCDC85B	336.407	1.18702	0.002331
CCNB1	598.606	-1.17128	0.004662
CCNK	506.224	-1.30098	0.0011655
CDC42	2237.39	-5.0774	0.0011655
CDH24	108.031	1.0826	0.002331
CDH8	341.407	-1.02535	0.0011655
CDKL5	379.134	-1.33358	0.0011655
CDKN2D	128.309	-1.308	0.00815851
CDKN3	133.376	-1.61072	0.0011655
CDON	212.448	-1.55877	0.0011655
CDT1	284.211	1.44489	0.0011655
CEBPB	240.25	1.05711	0.0011655
CEBPD	243.636	1.43836	0.0011655
CENPF	1098.77	-1.56429	0.002331
CEP170B	823.147	1.76205	0.0011655
CEP95	406.83	-1.08958	0.0011655
CERS6	2057.53	-1.08669	0.0011655
CFAP44	126.242	-1.65814	0.0011655
CHCHD2	1607.62	-2.88722	0.0011655
CIC	1818.62	1.04073	0.0011655
CISH	271.313	-1.34698	0.002331
CITED4	398.047	1.41729	0.0011655
CKM	11730.7	-1.44793	0.013986
CKMT2	3760.77	-2.12113	0.0011655
CKS2	242.77	-1.28931	0.002331
CLDN6	1819.01	2.58329	0.0011655
CLEC11A	106.644	1.74499	0.0011655
CLIC5	3196.58	-2.77535	0.0011655
CLN5	126.125	-1.13249	0.0011655
CMAHP	173.501	-2.46729	0.004662
CMTM5	459.827	10.2498	0.0011655
CMYA5	5572.04	-1.26301	0.0011655
CNTN4	240.724	-3.01154	0.013986
COL12A1	1624.21	-3.8935	0.0011655
COL16A1	1469.16	-1.20576	0.013986
COL25A1	142.258	1.21316	0.0221445
COL2A1	4256.07	1.17327	0.034965
COL6A1	5108.45	1.47903	0.0011655
COL7A1	1800.07	1.20478	0.002331
COMMD7	792.242	-1.01831	0.0011655
COMT	214.377	-1.93372	0.0011655
COMTD1	356.905	1.8561	0.0011655
COPZ2	170.53	-1.17393	0.002331
COQ3	181.357	-1.15714	0.0011655
COQ6	451.45	-1.69671	0.0011655
CORO2B	285.686	-1.50295	0.002331
COX20	682.717	-4.01826	0.0011655
CPNE5	1719.21	-1.76139	0.0221445
CPS1	585.997	-1.13338	0.0011655
CPT1C	408.585	1.945	0.0011655
CRABP2	3833.07	-1.34559	0.034965
CRACR2B	477.051	1.37843	0.0011655
CRB2	209.792	1.01389	0.0221445
CRELD1	1010.2	-1.1714	0.0011655
CRLS1	902.354	1.1828	0.0011655
CROCC	228.645	1.38466	0.0011655
CRYAB	11503.8	-2.57323	0.0011655
CRYBG3	1193.97	-1.91062	0.0011655
CRYL1	158.168	-1.39241	0.034965
CSK	1449.45	1.01784	0.0011655
CTXN1	341.9	2.30288	0.0011655
CUBN	157.963	-2.41791	0.002331
CUX2	1706.34	1.27111	0.034965
CYBA	569.891	2.35208	0.0011655
CYP26B1	118.936	-2.04307	0.0011655
CYP2J2	1442.78	-1.22734	0.034965
DAB1	810.059	-1.16887	0.00815851
DACH1	109.366	1.10406	0.034965
DBI	1099.87	-1.81144	0.0011655
DBNDD1	283.637	1.13025	0.0011655
DDIT3	255.808	-1.46067	0.0011655
DDIT4	351.236	-2.2779	0.0011655
DDX5	8435.41	-1.05127	0.0011655
DDX60	199.157	-2.29039	0.0011655
DERL3	116.519	-2.95042	0.0011655
DES	2307.74	-5.54395	0.0011655
DEXI	333.876	-3.20185	0.0011655
DGAT2	182.599	-1.64677	0.0011655
DGKH	862.474	-1.03027	0.0011655
DHCR24	3337.3	-1.86024	0.0011655
DHRS11	129.778	1.05931	0.0011655
DHRS3	895.507	-3.10758	0.0011655
DIAPH3	251.272	1.08313	0.0221445
DIMT1	390.553	1.11289	0.0011655
DIRAS3	151.691	-3.27673	0.004662
DISC1	394.622	3.97891	0.0011655
DKK3	10886.3	-1.13363	0.0011655
DMD	6685.67	-1.90817	0.0011655
DMWD	1381.79	1.12015	0.0011655
DMXL2	760.918	-1.38918	0.0011655
DOCK4	346.419	-1.06652	0.034965
DOCK5	147.296	-1.04396	0.002331
DOCK9	862.242	-1.77211	0.0011655
DOHH	197.255	1.12987	0.0011655
DPCD	347.384	-1.30213	0.0011655
DPP7	1108.98	1.05	0.0011655
DPYSL5	290.901	-3.57066	0.0011655
DRD1	194.275	1.4744	0.034965
DRP2	165.957	-2.14262	0.004662
DSP	10208.6	-1.10009	0.0011655
DST	4045.28	-2.52739	0.0011655
DUSP18	102.73	-1.41054	0.0011655
DUSP26	720.429	-1.27947	0.0011655
DUSP8	410.39	1.05482	0.0011655
DYNC1H1	9985.84	-1.52073	0.0011655
DYNC2H1	215.369	-1.38172	0.0011655
DYNLT1	1601.93	-1.04701	0.0011655
DYRK1B	741.088	1.01482	0.0011655
ECI2	1066.61	-1.95701	0.0011655
EDA	534.685	-1.97641	0.002331
EEF1A1P5	1549.76	-1.95221	0.00815851
EEF1D	3253.48	-1.97964	0.0011655
EFHC1	211.203	-1.00642	0.013986
EFS	135.944	1.74777	0.013986
EGF	209.439	-1.50061	0.004662
EGFL7	185.99	1.07775	0.034965
EGLN3	622.738	-3.24833	0.0011655
ELFN1	445.157	1.63082	0.0011655
ELN	335.742	-10.1921	0.0221445
EMC10	9332.56	2.68734	0.0011655
EMC6	213.994	-3.8319	0.0011655
EML1	606.686	-2.1639	0.002331
ENDOG	554.262	-1.0676	0.00815851
ENO2	965.095	-1.68483	0.034965
EPS8L2	534.408	2.88265	0.0011655
ERAP1	513.995	-1.08343	0.0011655
ERF	1151.39	1.30773	0.0011655
ESRRB	180.58	1.22116	0.013986
ETHE1	155.133	-1.67844	0.0011655
EVA1B	112.275	2.21794	0.0011655
EXD3	298.268	1.50716	0.0011655
EXOSC6	822.444	1.74232	0.0011655
EYA1	166.139	-3.77301	0.0011655
EYA4	362.273	1.01112	0.0221445
FABP3	13182.6	-1.29692	0.002331
FABP5	504.322	2.80623	0.0011655
FADD	250.719	-1.4701	0.002331
FAM13A	406.862	-1.021	0.0011655
FAM155B	182.35	-2.63029	0.002331
FAM162A	1802.83	-1.23642	0.0221445
FAM173A	257.688	1.36824	0.0011655
FAM189A2	2425.23	1.0942	0.0011655
FAM207A	255.975	1.26097	0.0011655
FAM219B	1086.74	-1.60771	0.0011655
FAM229B	359.313	-1.42631	0.0011655
FAM83H	394.493	2.05849	0.0011655
FAT1	5442.27	-1.6048	0.0011655
FAT3	555.422	-2.91517	0.00815851
FAT4	424.705	-1.81627	0.0011655
FBRSL1	1102.23	1.72832	0.0011655
FBXL19	611.782	1.34419	0.0011655
FBXL7	2647.42	-1.2321	0.0011655
FBXO2	233.491	1.45495	0.0011655
FBXO32	4966.15	1.17328	0.013986
FBXO41	171.218	1.20518	0.0011655
FBXW7	801.63	-1.46394	0.002331
FDFT1	2349.2	-1.32533	0.0011655
FDPS	1392.6	-1.96463	0.0011655
FEM1A	807.791	-3.23512	0.0011655
FGF10	118.813	-1.03109	0.00815851
FHL2	13585	-1.6377	0.0221445
FIP1L1	628.705	-1.00279	0.0011655
FIZ1	323.311	1.12164	0.0011655
FKBP2	378.711	1.00804	0.034965
FLNB	2263.98	-1.03822	0.034965
FOS	149.461	1.27245	0.034965
FOXP4	1062.76	1.07634	0.0011655
FRAS1	4734.05	-2.05836	0.0221445
FRMD5	1176.97	-1.62154	0.0011655
FRMD8	569.75	1.00242	0.002331
FRY	2796.58	-2.26259	0.0011655
FRYL	922.956	-1.15526	0.0011655
FSCN1	4426.47	1.06972	0.034965
FSIP2	128.463	-2.11592	0.0011655
FTH1	8993.15	-1.23865	0.0011655
FUOM	105.315	1.3611	0.002331
FXYD6	2519.88	-1.1807	0.00815851
FZD5	194.124	1.25667	0.00815851
G0S2	841.806	-3.44955	0.0011655
GABRE	619.507	-2.07655	0.0011655
GALK2	271.142	-1.33059	0.034965
GALNT16	304.789	-1.46601	0.002331
GALNT18	317.423	-2.15228	0.0011655
GAPDH	62553.5	-1.71904	0.0011655
GARNL3	241.885	-1.02304	0.0011655
GAS2L1	283.567	1.21133	0.0011655
GAS6-AS1	327.018	1.33366	0.002331
GATA5	149.296	1.90736	0.0011655
GATAD2A	1370.36	1.33507	0.0011655
GATB	761.825	-1.0431	0.0011655
GATC	326.079	-1.40875	0.0011655
GGT1	214.734	1.85287	0.004662
GIGYF1	1750.45	1.03687	0.0011655
GIT2	851.599	-1.17103	0.0011655
GJA5	1361.87	-2.35214	0.0011655
GLRX2	311.05	1.45072	0.002331
GMIP	170.758	1.13491	0.002331
GOLGA2P10	202.493	-1.22778	0.0011655
GPATCH4	432.586	1.00524	0.0011655
GPD1L	1335.71	-1.82511	0.004662
GPR137B	117.132	-1.3205	0.002331
GPR183	128.08	-1.77121	0.00815851
GPR22	523.815	-1.29799	0.002331
GPR39	162.658	-4.8249	0.0011655
GPRC5C	389.287	1.21192	0.0011655
GPSM1	1535.15	1.40117	0.0011655
GPSM2	107.955	-1.00347	0.004662
GPX3	1529.08	-1.91474	0.034965
GPX7	151.098	-1.22482	0.0221445
GRB14	104.658	-1.47842	0.0011655
GRK5	854.3	-1.1295	0.004662
GRM1	168.843	-6.97028	0.034965
GSTM3	750.035	-1.04937	0.0011655
GTF2IRD2B	304.064	1.13155	0.004662
H3F3AP4	677.849	1.08526	0.0011655
HAGHL	257.519	1.35606	0.0011655
HAND1	1472.92	1.88637	0.0011655
HAPLN3	191.607	-1.05794	0.0221445
HCN1	107.311	1.07783	0.0221445
HDAC8	193.788	-1.43566	0.0011655
HDDC3	167.289	-1.14669	0.0011655
HDHD2	234.264	-3.67606	0.0011655
HEG1	1900.98	-1.24337	0.0011655
HEIH	216.248	-1.21424	0.0011655
HELLS	180.101	1.05008	0.0011655
HERC1	2271.94	-1.88914	0.0011655
HES4	468.636	1.83419	0.0011655
HEXA	781.166	-1.26748	0.0011655
HIGD2A	1490.13	-1.11734	0.0011655
HINT1	2196.65	-1.28861	0.0011655
HINT2	112.574	-4.10059	0.0221445
HIST1H1C	250.429	1.05074	0.004662
HLA-B	325.255	-2.93165	0.034965
HLA-C	283.7	-1.95899	0.034965
HMGA1	1793.24	1.06856	0.0011655
HMGA2	1954.51	1.55813	0.004662
HMGB1P5	142.846	-2.01205	0.013986
HMGCS1	4078.9	-1.47146	0.0011655
HOMER3	262.962	1.14252	0.00815851
HSD17B14	176.338	2.86291	0.0011655
HSP90AA2P	106.278	-6.16947	0.0011655
HSPA2	260.027	1.54262	0.0011655
HSPA5	9705.9	-1.15541	0.0011655
HSPA8	16374.3	-1.12649	0.0011655
HSPB3	3338.51	-1.22953	0.002331
HSPG2	14189.9	-1.30296	0.0011655
HUWE1	6504.16	-1.27435	0.0011655
ID3	258.95	-1.51355	0.034965
IDH3A	2603.14	-1.16	0.004662
IDUA	316.74	2.14425	0.0011655
IFI27	103.12	-4.19915	0.002331
IFNGR2	569.904	-1.06124	0.0011655
IFNLR1	126.36	2.03313	0.0011655
IFT22	470.102	-1.47268	0.0011655
IGDCC3	101.242	2.02104	0.004662
IGFBP6	144.645	-1.01116	0.013986
IGSF1	102.852	-1.89771	0.0011655
IGSF9B	352.308	-1.07298	0.0011655
IL17RA	144.406	-1.05572	0.0011655
IL17RC	513.506	1.09304	0.0011655
IL3RA	249.295	5.81596	0.0011655
ILK	2640.82	-4.67977	0.0011655
IMP3	302.18	-1.32382	0.0011655
INAFM1	115.474	1.16556	0.0011655
INF2	1042.2	1.06268	0.0011655
INPP5E	508.084	1.17492	0.0011655
IRAK1	1190.73	1.26458	0.0011655
IRF2BP1	550.034	1.23216	0.0011655
IRS2	429.477	1.88379	0.013986
IRX3	1011.34	1.44559	0.0011655
IRX4	2210.12	2.47513	0.0011655
ITGA10	225.382	-3.72236	0.004662
ITGA7	4235.27	-1.51907	0.0011655
JAG2	497.505	1.77163	0.0011655
JMJD4	283.73	-1.48537	0.0011655
JMJD8	694.648	-1.01659	0.0011655
JPX	177.165	-4.00792	0.0011655
JTB	465.148	-2.96718	0.0011655
JUND	1274.95	1.15279	0.0011655
KAT5	468.959	-1.596	0.0011655
KBTBD4	302.091	-1.71794	0.0011655
KCNMB1	167.847	-2.34448	0.0011655
KCNQ1OT1	200.837	-2.1027	0.0011655
KCNQ3	171.129	-3.01004	0.0011655
KCTD12	2314.01	1.73212	0.013986
KHSRP	3644.48	1.19641	0.0011655
KIAA0319	235.203	-2.06181	0.034965
KIAA0391	274.339	-1.97302	0.004662
KIAA1109	2647.76	-1.74518	0.0011655
KIDINS220	5185.49	-1.17527	0.0011655
KIF20A	598.733	-1.93601	0.0011655
KIF26A	475.612	1.42334	0.004662
KLF10	175.947	-1.15038	0.013986
KLF16	374.352	1.11584	0.0011655
KLHL15	215.907	-1.20132	0.00815851
KLHL17	165.66	1.26916	0.0011655
KMT2A	999.071	-1.18485	0.0011655
KMT2C	1494.18	-1.38023	0.0011655
KNSTRN	391.788	-1.02511	0.0011655
L3MBTL4	158.606	-1.4706	0.004662
LACTB2	203.371	-1.14083	0.0011655
LAMA2	9463.47	-1.21961	0.0011655
LAPTM4A	4346.62	-1.35362	0.034965
LDHA	8366.8	-2.17126	0.00815851
LDHB	5289.13	-3.83344	0.0221445
LDLR	1947.51	-1.38685	0.0011655
LDLRAD4	749.191	-1.14805	0.0011655
LENG8	4114.06	1.26397	0.0011655
LGALS8	1209.94	-1.75292	0.0011655
LIMCH1	587.2	-1.96361	0.034965
LIMD2	152.981	1.02299	0.0221445
LINC00205	512.254	1.08515	0.002331
LINC00339	148.348	-2.64077	0.0011655
LINC00662	459.33	-1.68429	0.0011655
LINC00674	138.936	1.10289	0.0011655
LINC00680	133.491	-1.24823	0.0011655
LINC00863	173.507	1.48757	0.0011655
LINC01521	221.07	1.01018	0.0011655
LINGO1	121.801	1.37908	0.0221445
LMAN2L	685.131	-1.00023	0.0011655
LMNB1	1386.91	1.23299	0.0011655
LMOD2	3415.41	-1.20348	0.0011655
LONRF2	236.67	-1.52941	0.0011655
LPCAT3	527.892	-1.50006	0.0011655
LRBA	1471.55	-1.38139	0.0011655
LRFN4	640.594	1.51954	0.0011655
LRP1	4546.91	-1.10605	0.0011655
LRRC4	294.781	1.08305	0.00815851
LRWD1	486.497	1.08649	0.0011655
LSM1	756.89	-1.20364	0.0011655
LSM6	115.235	-1.12671	0.0011655
LSMEM2	632.929	-1.28761	0.004662
LUC7L2	521.098	2.28677	0.0011655
LY6E	626.513	1.06624	0.013986
LYPD1	200.707	-5.03039	0.0011655
LYST	193.949	-1.29874	0.0011655
LZTFL1	293.618	-1.59578	0.0011655
MACF1	11807.5	-1.7818	0.0011655
MAF	210.454	1.21022	0.034965
MAMDC4	562.183	1.30827	0.0011655
MANF	752.766	-1.33827	0.0011655
MAP1S	680.617	1.09705	0.0011655
MAP3K14	181.409	-1.10089	0.034965
MAP3K5	209.515	-1.21899	0.00815851
MAPK12	493.248	1.73386	0.0011655
MARCKSL1	2492.33	1.10991	0.0011655
MARVELD1	850.882	1.17705	0.00815851
MAZ	1718.9	-1.13922	0.0011655
MB	2831.01	-1.60893	0.002331
MBD6	856.628	1.27509	0.0011655
MCMBP	789.247	-1.01454	0.0011655
MDFI	362.588	1.28194	0.0221445
MDK	10566.3	1.17493	0.0011655
MDM2	1652.22	1.21792	0.0011655
MDN1	1126	-1.27062	0.0011655
MEG3	1282.34	6.1087	0.0011655
MEGF9	156.789	-1.35939	0.004662
MEMO1	101.401	1.23982	0.0011655
MERTK	106.545	-1.12255	0.0011655
MEX3D	316.284	1.24292	0.002331
MFAP4	1938.69	-1.35905	0.034965
MFSD10	914.738	1.57671	0.0011655
MFSD6	261.034	-2.26886	0.013986
MGAT2	383.622	-4.26061	0.0011655
MGLL	246.33	-3.08245	0.0011655
MGP	319.137	-3.82	0.034965
MGRN1	1815.3	1.04418	0.0011655
MGST2	725.049	-1.28778	0.0011655
MIB2	1667.28	1.47698	0.0011655
MICA	304.672	-1.33819	0.0011655
MIDN	2628.9	2.01676	0.0011655
MIF	310.218	-6.53724	0.0011655
MIR210HG	139.982	-1.9489	0.002331
MIR4697HG	406.086	-1.44263	0.0011655
MIR600HG	152.151	-1.29231	0.0011655
MKI67	1153.44	-1.61795	0.0011655
MLLT11	3567.81	-1.06033	0.002331
MMP11	558.484	-1.5104	0.0221445
MMP14	1275.7	1.02918	0.034965
MMP23B	152.795	3.17209	0.0011655
MOB3C	138.304	-1.30885	0.0011655
MOG	216.017	-4.10955	0.0011655
MORC4	123.046	-1.11433	0.0011655
MOXD1	794.263	-5.25254	0.0011655
MRPL23	235.333	1.28919	0.0011655
MRPL33	687.186	-1.22415	0.004662
MRPS18A	430.366	-1.18304	0.0011655
MSI1	345.239	1.76941	0.0011655
MSX1	145.523	1.48666	0.00815851
MT-ATP6	145028	1.55602	0.018648
MT-CO1	554603	1.25283	0.044289
MT-CO2	148511	1.32402	0.018648
MT-CYB	145019	2.02858	0.002331
MT-ND1	99709.7	1.12079	0.0314685
MT-ND4	266544	1.44947	0.018648
MT-ND4L	43683.7	2.24446	0.0011655
MT-ND6	32609.3	5.4843	0.0011655
MT-TC	4090.5	16.0788	0.0011655
MT-TL1	195.99	8.0002	0.0011655
MT-TP	586.856	3.94576	0.0011655
MT-TY	224.286	5.97475	0.0011655
MTATP6P1	17294.5	-1.63722	0.0011655
MTERF2	642.21	-1.09792	0.0221445
MTMR3	599.719	-3.59684	0.0011655
MTND2P28	1905.07	-1.7284	0.0011655
MTND4P12	728.884	-8.62421	0.0011655
MTND5P11	146.255	-9.36826	0.0011655
MTRNR2L12	1330.44	-7.24612	0.0011655
MTRNR2L8	3343.18	-10.8556	0.0011655
MTSS1	1865.5	-1.38389	0.0011655
MTURN	1515.51	-1.27979	0.0221445
MTUS1	1894.66	-1.8713	0.00815851
MXRA8	280.827	1.40542	0.013986
MYC	251.717	-2.35941	0.034965
MYCBP2	880.316	-2.05985	0.0011655
MYCN	873.8	1.69031	0.0011655
MYH14	488.013	-1.12911	0.0221445
MYL2	27439.5	-3.09704	0.0221445
MYL4	59351.3	-1.14024	0.0011655
MYL7	192112	-1.30622	0.0011655
MYO15B	285.354	1.23677	0.0011655
MYO9A	803.894	-1.75814	0.0011655
MYOF	1617.5	-1.09342	0.0011655
MYOM2	1555.56	-5.28639	0.0011655
MYOZ1	176.161	-1.43748	0.0011655
MYPN	992.247	-1.02842	0.0011655
MYZAP	1134.7	-1.51965	0.0011655
N4BP3	482.121	1.46149	0.00815851
NAA60	679.301	1.26078	0.0011655
NAT8L	848.725	2.24018	0.0011655
NAV2	3355.66	-1.20819	0.0011655
NAV2-AS2	456.455	-4.84491	0.0011655
NBAS	1880.42	-1.00939	0.0011655
NBPF8	134.675	1.16074	0.0011655
NCEH1	106.337	-1.18498	0.0221445
NCKAP5	105.24	-1.09493	0.00815851
NCKAP5L	2202.59	1.31114	0.0011655
NDOR1	272.159	1.33599	0.0011655
NDRG1	204.219	-1.53889	0.0221445
NDUFA12	1468.94	-1.11725	0.0011655
NDUFA2	997.956	-1.49135	0.0011655
NDUFB3	1089.22	-1.09757	0.002331
NEDD8	811.716	-1.01357	0.0011655
NEDD9	604.387	-1.04752	0.013986
NEK2	126.001	-1.1132	0.0221445
NELFA	560.881	1.22842	0.0011655
NENF	263.579	-1.23516	0.002331
NEURL2	133.125	-1.51671	0.0011655
NFIB	996.346	-1.44379	0.00815851
NKX2-5	7123.18	1.11403	0.0011655
NKX2-6	214.737	1.64258	0.002331
NLGN4Y	142.748	2.10353	0.0011655
NLRP2	399.131	2.17318	0.0011655
NME4	2248.98	1.04144	0.0011655
NNAT	135.873	1.5367	0.0337995
NOD1	574.683	-1.13942	0.0011655
NOXA1	246.491	1.86739	0.0011655
NPAS2	419.852	-2.64294	0.0011655
NPDC1	636.484	1.16764	0.0011655
NPEPL1	234.996	1.56138	0.0011655
NPIPB5	193.284	-1.34888	0.0221445
NPNT	4140.33	-1.17784	0.0011655
NPY6R	946.806	-1.27624	0.034965
NR2F6	932.427	1.13926	0.0011655
NRAP	319.034	-4.62171	0.00815851
NSUN5P1	598.974	1.21877	0.00815851
NT5DC2	2705.76	-1.02844	0.0011655
NTRK2	157.114	-2.21708	0.013986
NUBP1	429.494	-1.43902	0.0011655
NUDT19	149.17	1.20561	0.0011655
NUDT3	1085.83	-2.83259	0.0011655
NUDT4	9909.92	1.10661	0.0011655
NUDT6	154.42	-1.3557	0.0011655
NUDT8	105.077	1.32422	0.0011655
NUFIP1	183.047	1.09279	0.0011655
NUTM2A-AS1	283.431	1.26636	0.0011655
NXPE3	450.69	-1.0052	0.0011655
OPLAH	643.146	1.43709	0.0011655
OPN3	127.413	-3.78435	0.0011655
OPRL1	110.578	1.66295	0.0011655
ORAI3	207.719	2.07262	0.0011655
OSBPL10	210.806	1.11009	0.034965
OSR1	195.731	-2.24575	0.002331
OTOG	106.397	1.13755	0.034965
OXTR	131.971	-2.71216	0.0011655
P2RX1	419.357	-2.84542	0.0011655
P4HA1	702.454	-1.33123	0.002331
P4HA2	847.072	-1.42808	0.0011655
PABPC1L	390.696	1.56649	0.0011655
PABPN1	1443.62	1.18356	0.0011655
PAIP2	1915.14	-1.15554	0.0011655
PALM	1197.81	1.12484	0.0011655
PALM2-AKAP2	139.465	3.81365	0.0011655
PAM	20473.8	-1.38182	0.0011655
PARL	211.238	-2.27364	0.0011655
PARP12	141.61	-1.54026	0.0221445
PARP14	183.222	-2.2294	0.034965
PARP9	143.462	-3.34368	0.034965
PARVB	404.722	1.66839	0.0011655
PCDHA10	166.139	2.22988	0.0011655
PCDHGA10	159.486	1.82828	0.0011655
PCSK1N	130.684	1.36633	0.0221445
PDE1C	364.243	-2.50548	0.013986
PDGFB	112.39	-1.20483	0.0221445
PDIA6	2871.81	-1.15563	0.0011655
PDK3	436.716	-2.27756	0.013986
PDLIM2	135.657	1.0836	0.002331
PDLIM7	2718.04	1.31532	0.0011655
PDPR	1718.23	-1.10345	0.0011655
PDXP	108.737	1.7203	0.002331
PEA15	6032.74	-1.27896	0.0011655
PEX11A	100.662	-1.22464	0.034965
PFDN5	2625.29	-1.16579	0.0011655
PGF	114.704	1.21293	0.0221445
PGK1	9957.01	-1.32331	0.0011655
PHACTR3	109.235	-2.3293	0.0011655
PHB	2237.64	-1.11856	0.0011655
PHF7	247.917	1.11965	0.0011655
PHKA2	870.844	-1.48863	0.0011655
PHLDA3	1359.86	1.26297	0.0011655
PI4KAP2	558.251	1.7069	0.0011655
PIAS4	522.914	1.07375	0.0011655
PIDD1	498.808	1.16517	0.0011655
PIGZ	100.844	-1.74514	0.0011655
PIK3IP1	286.411	-1.00864	0.004662
PIK3R3	1175.87	-1.25098	0.002331
PIM3	489.414	1.10115	0.0011655
PINK1	1912.68	-1.40481	0.0011655
PINK1-AS	159.484	-1.00839	0.0011655
PITPNM3	101.07	-2.61662	0.0011655
PITX2	329.902	1.43722	0.002331
PKMYT1	177.975	1.47531	0.0011655
PLA2G4C	229.942	-2.18329	0.0011655
PLCE1	511.329	-2.33026	0.002331
PLD1	719.102	-1.64581	0.0011655
PLEKHG2	1930.43	1.21429	0.0011655
PLEKHG4B	694.184	1.97369	0.0011655
PLEKHG5	1346.81	1.2048	0.034965
PLS1	150.694	1.01128	0.0011655
PLS3	2248.46	1.8289	0.0011655
PLTP	485.303	1.01406	0.034965
PLXNB3	103.421	2.06277	0.0011655
PLXNC1	184.754	-1.44936	0.0221445
PNMA3	101.97	1.64612	0.004662
PNMT	110.145	1.31059	0.002331
POLG2	173.341	-1.11135	0.0011655
POLR2I	460.844	-2.28765	0.0011655
POM121	1131.01	1.2475	0.0011655
POM121C	1033.61	1.24707	0.0011655
POMZP3	218.274	-1.78031	0.0011655
POSTN	1114.17	-1.96793	0.0011655
PPARD	879.546	-1.0187	0.004662
PPFIA2	222.192	-5.03935	0.0011655
PPIAP22	222.929	1.62458	0.0011655
PPIB	1990.12	-2.51575	0.0011655
PPIH	180.105	-1.14025	0.0011655
PPP1R1C	251.51	-3.96694	0.0011655
PPP1R3A	1232.77	-3.48997	0.004662
PPP1R9A	597.658	-1.05011	0.034965
PRDM8	219.824	-1.5911	0.0221445
PRDX1	4422.63	-1.41149	0.0011655
PRKX	308.407	1.23731	0.004662
PRKY	320.292	2.30047	0.0011655
PROSER3	392.157	1.24748	0.0011655
PRPF40B	503.365	-1.255	0.0011655
PRR12	822.92	1.15564	0.0011655
PRR5	222.43	1.0268	0.0011655
PRUNE2	232.456	-1.64222	0.0011655
PSMA1	784.284	-2.44949	0.0221445
PSMA2	532.147	-3.93473	0.0011655
PSMD7	1467.03	-1.24048	0.0011655
PSMG3	278.405	-1.26726	0.0011655
PSRC1	113.318	-1.24912	0.004662
PTBP3	416.645	1.07382	0.0011655
PTDSS1	1764.94	-1.45864	0.0011655
PTGR2	110.541	-1.40841	0.00815851
PTN	699.571	-1.04833	0.0011655
PTPRU	624.612	-1.25708	0.0011655
PTRHD1	248.651	-1.56065	0.0011655
PTTG1	553.927	-1.91162	0.0011655
PWWP2B	253.049	1.43398	0.0011655
PXYLP1	492.773	-2.13331	0.002331
RAB13	358.307	-1.62957	0.00815851
RAB3GAP1	1407.22	-1.16796	0.0011655
RAB8A	547.953	-1.1823	0.0011655
RAB9B	761.133	-1.79641	0.0011655
RAMP1	206.293	-2.41219	0.0221445
RANGRF	277.497	-5.11132	0.0011655
RAP1B	543.418	1.0128	0.0011655
RAP1GAP	372.817	1.18817	0.0221445
RAPGEF4	332.304	-1.71699	0.00815851
RAPH1	333.046	-2.12992	0.0011655
RARB	412.297	-2.18354	0.0011655
RASD2	220.829	-3.50228	0.004662
RASGRP2	276.204	1.40132	0.004662
RAVER1	404.685	1.3092	0.0011655
RBFOX1	202.519	-6.20285	0.0011655
RBM4	284.014	1.17175	0.0011655
RBM5	3197.48	-1.03703	0.0011655
RCOR2	755.084	1.36552	0.0011655
REC8	307.656	1.18869	0.00815851
RECQL4	269.223	1.23067	0.0011655
RELN	3839.4	-2.04944	0.002331
RENBP	327.6	1.3613	0.0011655
REPS2	338.689	-1.01725	0.002331
RERG	106.359	1.17485	0.0011655
REXO1	690.527	1.2716	0.0011655
RGMB	362.414	-1.08647	0.0011655
RGS19	105.851	1.49628	0.0011655
RHBDL1	110.269	1.52549	0.0011655
RHOF	204.319	-1.26935	0.0011655
RHOT2	3162.45	1.00314	0.0011655
RHPN1	292.92	1.50227	0.0011655
RIC8B	530.568	-1.2295	0.0011655
RN7SL2	306.208	5.33199	0.0011655
RNF138	360.109	1.16403	0.0011655
RNF157	128.449	-1.03714	0.00815851
RNF208	339.344	1.59197	0.0011655
RNF31	280.918	1.72767	0.0011655
RNF44	1735.99	1.68411	0.0011655
RNPC3	922.187	1.03886	0.0011655
ROBO1	2300.51	-1.53574	0.0011655
ROMO1	999.099	-1.85104	0.0011655
ROR2	1212.93	1.69441	0.0011655
RPL11	7872.69	-1.09862	0.0011655
RPL13AP25	101.877	-4.06995	0.0011655
RPL13AP5	208.109	-2.36862	0.0011655
RPL15P3	314.394	-3.99862	0.0011655
RPL17	122.202	1.57237	0.0011655
RPL18AP3	214.455	-2.55123	0.0011655
RPL24P4	222.287	-7.34121	0.0011655
RPL26	519.252	-1.47376	0.0011655
RPL30	5972.36	-1.81619	0.0011655
RPL31	9531.11	-1.43255	0.0011655
RPL35A	6496.99	-1.10574	0.0011655
RPL37	6486.46	-1.07472	0.0011655
RPL37A	11336.3	-1.41852	0.0011655
RPL38	3425.66	-1.29037	0.0011655
RPL39	3697.63	-1.78249	0.0011655
RPL3P4	380.888	-4.95514	0.0011655
RPL41P1	502.333	3.56244	0.0011655
RPL5P34	107.194	-4.27273	0.00815851
RPL6P27	316.026	-3.39689	0.0011655
RPL7AP6	177.705	-3.33976	0.0011655
RPL7P1	363.115	-4.22317	0.00815851
RPL7P9	252.728	-3.91865	0.0011655
RPLP0P6	345.429	-4.64218	0.0011655
RPP25	197.087	1.58935	0.0011655
RPP38	142.6	-1.05672	0.0011655
RPS11	10883.4	-1.54377	0.0011655
RPS13	5326.07	-1.04934	0.002331
RPS15A	2301.8	-1.45821	0.0011655
RPS16	8295.79	-1.15136	0.0011655
RPS20	7738.04	-1.26651	0.0011655
RPS20P14	157.635	-10.9807	0.0011655
RPS23	6658.34	-1.31933	0.0011655
RPS25	5358.04	-1.05297	0.00815851
RPS29	2792.95	-1.75071	0.0011655
RPS3AP6	154.659	-2.69835	0.0011655
RPS4X	13379.7	-1.59342	0.0011655
RPS6	11323.6	-1.04768	0.0011655
RPS7P1	463.261	-4.40922	0.0011655
RRS1	274.947	1.53961	0.0011655
RTTN	283.062	-1.01305	0.0011655
RYR2	12866.5	-1.99529	0.0011655
S100A4	521.56	-1.02455	0.013986
S1PR3	695.914	-1.3715	0.002331
SACS	1148.17	-1.22795	0.0011655
SAMD10	229.236	1.08326	0.0011655
SAMD12	198.777	-2.22288	0.013986
SAPCD2	101.571	-1.2253	0.004662
SARM1	127.537	-1.02497	0.013986
SAT1	530.539	-1.87087	0.0011655
SBK1	261.91	1.23448	0.002331
SCAF1	1925.88	1.55271	0.0011655
SCAMP4	741.268	1.34277	0.0011655
SCAMP5	459.561	1.41621	0.0011655
SCAND1	710.827	1.36045	0.0011655
SCAND2P	250.06	-3.14898	0.0011655
SCARA3	155.335	-1.97615	0.034965
SCARF1	175.357	1.31443	0.0011655
SCARF2	452.028	1.95592	0.0011655
SCO2	159.093	-6.25337	0.0011655
SCRIB	1861.62	1.58049	0.0011655
SDHA	6107.67	1.01356	0.013986
SDR39U1	574.281	-1.75328	0.0011655
SEC14L5	711.072	-1.31505	0.0221445
SEMA3A	388.104	-1.3568	0.0011655
SEMA6B	533.395	1.9436	0.0011655
SEMA6D	1215.31	-1.48497	0.0011655
SERF2	3563.96	-1.07891	0.0011655
SERINC2	168.61	1.24081	0.004662
SERPINE2	1043.98	1.12033	0.034965
SF3A2	1028.28	1.0549	0.0011655
SFMBT2	145.527	-2.12839	0.0011655
SFRP5	436.92	-1.80127	0.034965
SGCD	164.301	-3.79924	0.0011655
SGCE	460.907	-1.61022	0.0221445
SGIP1	249.614	-1.23419	0.002331
SH3BGR	1465.71	-3.68891	0.0011655
SH3BP5	836.184	-2.37111	0.004662
SH3D21	309.379	1.18266	0.00815851
SH3RF2	1044.93	-2.18323	0.002331
SH3TC2	410.752	-2.14211	0.0011655
SHD	777.422	1.0875	0.034965
SKI	1370.04	1.21342	0.0011655
SLC12A6	623.461	-1.13614	0.013986
SLC15A2	212.134	-2.85365	0.0221445
SLC15A4	122.769	-7.39295	0.0011655
SLC19A1	287.822	2.24327	0.0011655
SLC1A4	1260.23	-1.07857	0.034965
SLC22A17	1178.81	1.82421	0.0011655
SLC22A5	233.517	-1.01428	0.0011655
SLC25A22	187.306	1.23216	0.0011655
SLC25A51	318.752	1.03126	0.0011655
SLC26A9	119.609	-1.916	0.004662
SLC29A4	391.118	1.62996	0.0011655
SLC2A12	457.274	-1.76846	0.0011655
SLC35D3	106.588	1.10142	0.004662
SLC38A10	1416.72	1.04147	0.0011655
SLC41A1	2761.69	-1.05604	0.0221445
SLC45A2	121.489	1.45798	0.034965
SLC46A1	113.528	-1.74382	0.0011655
SLC7A6	1066.27	-1.33705	0.004662
SLC7A6OS	402.169	-2.05557	0.0011655
SLCO3A1	1457.63	-1.04537	0.0011655
SLFN13	221.872	1.23904	0.0011655
SMAP1	909.786	-1.43924	0.0011655
SMDT1	764.897	-1.00661	0.0011655
SMG1	1988.15	-1.06918	0.0011655
SMIM4	249.894	-1.00569	0.002331
SMURF2	580.23	-1.02747	0.0011655
SNAP23	529.082	-1.93625	0.0011655
SNAP91	1635.9	-2.81364	0.0011655
SNAPC4	413.851	1.2472	0.0011655
SNCA	434.377	-1.28217	0.0011655
SNCAIP	296.612	-1.11908	0.004662
SNHG5	544.149	-1.39956	0.0011655
SNRNP70	6654.75	1.09665	0.0011655
SNRPD2	1605.71	-1.02712	0.0011655
SNX1	1442.47	-1.76448	0.0011655
SNX18P3	106.105	-2.36716	0.013986
SOCS2	257.885	-1.46601	0.0221445
SOD3	465.753	1.00194	0.034965
SORCS1	927.226	-1.32514	0.0011655
SORL1	136.985	-1.819	0.0011655
SOX12	2191.88	1.0079	0.0011655
SPATA18	359.356	1.58693	0.002331
SPATA2L	104.716	1.03437	0.00815851
SPECC1	946.672	1.40466	0.004662
SPIN3	308.054	1.20399	0.0011655
SPOCK1	1810.13	-1.20134	0.034965
SPOCK2	317.662	-4.21934	0.0221445
SPPL2B	959.621	1.54006	0.0011655
SPRED2	338.844	1.11702	0.00815851
SPSB3	332.656	-5.44083	0.0011655
SPTB	2749.45	-1.2547	0.034965
SRC	1053.49	1.10569	0.0011655
SRCIN1	200.961	1.22031	0.002331
SRP14-AS1	313.824	-1.3471	0.013986
SRR	298.229	-1.35718	0.0011655
SRRD	448.591	-1.0287	0.0011655
SSPN	663.383	-1.58653	0.0011655
ST20-AS1	154.027	1.32138	0.0011655
STAG3L2	123.246	1.21803	0.0011655
STARD13	469.925	-1.13067	0.002331
STARD4-AS1	460.229	7.56813	0.0011655
STRA6	212.704	1.25569	0.0011655
STX16-NPEPL1	165.628	1.11981	0.00815851
STX1B	119.438	1.15137	0.034965
STXBP2	145.953	1.552	0.0011655
STXBP6	309.28	-1.95384	0.00815851
SULT1A1	233.826	-2.15655	0.0011655
SUPT3H	197.074	-1.5364	0.0011655
SUPT4H1	300.403	-11.0132	0.0011655
SUZ12P1	176.707	1.13019	0.0011655
SV2B	173.439	-4.39489	0.00815851
SV2C	1175.19	2.42021	0.0011655
SVIP	201.037	-1.05683	0.013986
SYAP1	1368.24	1.1995	0.0011655
SYNC	243.723	-1.53824	0.0011655
SYNE1	2229.82	-1.56455	0.0011655
SYNGR3	206.249	1.38502	0.013986
SYNM	1846.17	-1.66196	0.0011655
SYT7	831.737	1.59046	0.0011655
SYTL1	131.11	2.19936	0.0011655
SYTL3	210.748	-1.40949	0.0011655
TAP1	192.543	-2.37991	0.002331
TBC1D14	897.071	-1.09059	0.0011655
TBC1D24	274.706	1.13671	0.0011655
TBX18	329.811	-2.71962	0.034965
TCF3	1386.2	1.08842	0.0011655
TCIRG1	153.168	1.32019	0.0011655
TENM2	273.077	-2.4628	0.013986
TENM4	1008.85	-1.55749	0.00815851
TEX2	1844.88	-1.26613	0.0011655
TFPI2	486.453	2.85488	0.013986
TGFB1	1007.61	1.27832	0.0011655
TGFBR3	259.62	-1.49496	0.0011655
THBS4	530.735	-2.05816	0.013986
THOC3	202.88	1.02097	0.0011655
THSD7A	143.454	-1.68912	0.0011655
TIGD5	342.387	1.01395	0.0011655
TIGD7	147.549	-1.91057	0.0011655
TIMM23B	273.038	1.03614	0.0011655
TINAGL1	390.526	-1.47775	0.004662
TMA7	728.481	-1.61977	0.0011655
TMBIM4	129.027	2.19868	0.0011655
TMED1	565.984	-1.96157	0.0011655
TMEM161B-AS1	254.163	-1.49017	0.0011655
TMEM205	403.994	-1.36731	0.0011655
TMEM254	165.346	-1.05002	0.0011655
TMEM260	295.92	-1.06336	0.013986
TMEM40	122.965	-1.14973	0.013986
TMEM45A	219.496	-1.22137	0.00815851
TMEM53	172.348	-1.61052	0.002331
TMEM71	519.291	1.49126	0.013986
TMEM88	215.932	2.06979	0.0011655
TMEM8A	2023.53	1.00889	0.0011655
TMUB1	510.909	1.04611	0.0011655
TNFRSF25	279.235	1.51385	0.00815851
TNK2	2080.31	1.69502	0.0011655
TNMD	143.786	-2.04617	0.0221445
TNNC1	43012.6	-1.22946	0.0011655
TNNI3	3327.87	-2.55128	0.013986
TOMM7	1309.36	-1.90102	0.0011655
TONSL	445.422	1.58493	0.0011655
TOP3B	283.104	-5.71863	0.0011655
TOR4A	555.109	1.97011	0.0011655
TP53TG1	110.643	-1.4072	0.0011655
TPGS1	129.331	1.3116	0.0011655
TPI1P1	115.242	-4.64708	0.0011655
TPT1	24714.6	-1.76941	0.0011655
TRAPPC6B	439.448	-2.01834	0.0011655
TRH	1883.18	3.22112	0.0011655
TRIB1	1860.31	1.28412	0.002331
TRIM21	122.638	-1.002	0.0221445
TRIM25	399.036	-1.11685	0.00815851
TRIOBP	2496.51	1.59707	0.0011655
TRIP6	756.1	1.48503	0.0011655
TRPC3	198.957	-1.22703	0.0011655
TSFM	267.133	1.4539	0.0011655
TSHZ2	402.72	-1.84966	0.0011655
TSPAN32	967.947	2.69843	0.0011655
TTN	96314.5	-3.44702	0.0011655
TTYH3	3421.3	1.33473	0.0011655
TUBA1B	9354.36	-1.79561	0.0011655
TUBA1C	642.464	-1.2768	0.0011655
TUBA4A	227.635	-2.16613	0.0011655
TUBE1	406.786	-1.16922	0.0011655
TUBGCP4	408.316	-1.22847	0.0011655
TUSC1	210.384	1.6054	0.0011655
TXLNGY	345.015	1.3599	0.020979
TXNDC17	455.722	-1.3233	0.0011655
TXNIP	4110.41	-7.5143	0.0011655
TXNRD2	158.87	-1.79571	0.0011655
TYMS	1093.34	-1.75935	0.0011655
UAP1L1	763.004	1.22557	0.002331
UBA6-AS1	141.647	-1.0362	0.0011655
UBA7	212.195	-2.76514	0.004662
UBALD1	541.991	1.24335	0.0011655
UBB	7808.13	-2.85305	0.0011655
UBC	11189.4	-1.83141	0.0011655
UBE2T	450.757	-1.19267	0.0011655
UBL5	1620.24	-1.27691	0.0011655
UBR4	7846.98	-1.12337	0.0011655
UHRF1	324.194	1.13854	0.004662
UNC5B-AS1	147.118	1.27316	0.013986
UQCC2	1027.7	-1.17545	0.0011655
UQCR10	2742.83	-1.4881	0.0011655
UQCRFS1P1	117.12	4.25107	0.0011655
USP54	303.451	-1.2102	0.0011655
UTRN	2773.21	-1.02884	0.0011655
UXT	519.598	-1.22725	0.0011655
VASN	437.281	1.31718	0.0011655
VAV2	845.778	1.11698	0.0011655
VIM	9937.78	-1.87234	0.0011655
VIPR2	152.703	-3.31314	0.0011655
VPS13A	1182.44	-1.10374	0.0011655
VPS13D	3103.07	-2.72112	0.0011655
VSNL1	126.478	-2.36027	0.0011655
WDFY3	1808.49	-1.23923	0.0011655
WDR45	527.254	1.05877	0.0011655
WDR73	333.738	-2.1189	0.0011655
WDR83	150.134	-1.44603	0.0011655
WDR86	211.856	1.27033	0.00815851
WDR90	332.207	1.01988	0.0011655
WNK2	2827.17	1.21436	0.0011655
WSB1	5321.49	1.06218	0.0011655
WSCD2	108.973	-4.1324	0.0011655
XIRP2	736.998	-5.18694	0.034965
YBX1P10	132.183	-3.7747	0.004662
YBX2	224.932	1.02714	0.0011655
YDJC	165.958	1.31428	0.0011655
YPEL1	359.169	-1.5148	0.00815851
ZBED5-AS1	145.124	-1.15086	0.00815851
ZC3H3	473.106	1.08931	0.0011655
ZDBF2	729.705	-1.01436	0.0221445
ZDHHC8	986.441	1.46251	0.0011655
ZFP36L1	8143.17	1.10327	0.002331
ZFP36L2	1470.15	1.12561	0.0011655
ZFPL1	226.528	-1.72175	0.0011655
ZFPM1	471.734	1.26826	0.0011655
ZFY	229.067	1.60658	0.0011655
ZMAT5	314.507	-1.15856	0.0011655
ZNF155	161.495	-1.09299	0.0011655
ZNF219	1509.7	1.40414	0.0011655
ZNF224	202.498	-1.22014	0.0011655
ZNF248	311.191	-3.2879	0.0011655
ZNF25	112.167	-1.16285	0.00815851
ZNF280D	178.573	-1.60277	0.0011655
ZNF316	1110.39	1.18726	0.0011655
ZNF32	370.831	-1.14055	0.0011655
ZNF320	280.622	-2.03283	0.013986
ZNF337	264.43	-3.00356	0.0011655
ZNF385A	676.001	1.05779	0.0011655
ZNF414	264.749	1.696	0.0011655
ZNF436-AS1	149.94	1.10202	0.0011655
ZNF467	180.501	1.91849	0.002331
ZNF503	426.88	1.37323	0.00815851
ZNF517	202.656	1.58749	0.0011655
ZNF528	255.417	1.023	0.034965
ZNF528-AS1	173.223	2.0477	0.0011655
ZNF579	336.224	2.21542	0.0011655
ZNF580	402.539	1.21311	0.0011655
ZNF585B	172.542	1.40213	0.0011655
ZNF587B	202.119	1.00289	0.0011655
ZNF626	104.859	1.6934	0.0011655
ZNF628	149.329	2.27021	0.0011655
ZNF696	169.532	1.34532	0.0011655
ZNF703	468.358	1.60592	0.0011655
ZNF710	739.492	2.51751	0.0011655
ZNF718	158.689	1.30993	0.0011655
ZNF738	256.993	1.04241	0.0011655
ZNF75D	407.475	-1.20749	0.004662
ZNF771	118.799	1.05647	0.0011655
ZNF783	206.022	1.17303	0.0011655
ZNF787	638.164	1.34569	0.0011655
ZNF844	263.625	1.6329	0.0011655
ZNF850	341.515	1.55456	0.0011655
ZNF865	617.267	1.54373	0.0011655
ZNRD1	146.655	-1.90804	0.0011655
ZNRF3	387.307	1.71155	0.0011655
ZSCAN21	187.524	-1.07665	0.0011655
ZSCAN32	210.226	-5.16819	0.0011655
ZSWIM5	112.432	-1.24231	0.0221445
