# Supplementary material for: Comparative analysis of the cardiomyocyte differentiation potential of induced pluripotent stem cells reprogrammed from human atrial or ventricular fibroblasts
Source: Frontiers journal article supplement (doi:10.3389/fbioe.2023.1108340), 2023-02-10
Supplement: Table_1.pdf [file Table_1.pdf]

## TABLES

**Supplemental Table 1. Antibodies.**

| Reagent                                             | Manufacturer           | Catalog No. | Type              | Dilution |
|-----------------------------------------------------|------------------------|-------------|-------------------|----------|
| <b>Primary Antibodies</b>                           |                        |             |                   |          |
| Anti-Vimentin antibody                              | Abcam                  | ab92547     | Rabbit monoclonal | 1:500    |
| Anti-Fibroblasts Antibody, clone TE-7               | Millipore              | CBL271      | Mouse monoclonal  | 1:100    |
| Anti-Tra-1-60 antibody                              | Abcam                  | ab16288     | Mouse monoclonal  | 1:100    |
| Human CD44s Pan Specific Antibody                   | R&D Systems            | BBA10       | Mouse monoclonal  | 1:100    |
| Anti-Oct4 antibody                                  | Abcam                  | ab19857     | Rabbit monoclonal | 1:100    |
| Anti-Nanog antibody                                 | Abcam                  | ab109250    | Rabbit monoclonal | 1:100    |
| Anti-SOX2 antibody                                  | Abcam                  | ab97959     | Rabbit monoclonal | 1:100    |
| Anti-SSEA4 antibody                                 | Abcam                  | ab16287     | Mouse monoclonal  | 1:100    |
| <b>Secondary Antibodies</b>                         |                        |             |                   |          |
| Cy3 AffiniPure Donkey Anti-Rabbit IgG               | Jackson ImmunoResearch | 711-165-152 | Donkey monoclonal | 1:200    |
| Cy5 AffiniPure Donkey Anti-Mouse IgG                | Jackson ImmunoResearch | 715-175-150 | Donkey monoclonal | 1:200    |
| Fluorescein (FITC) AffiniPure Donkey Anti-Mouse IgG | Jackson ImmunoResearch | 715-095-150 | Donkey monoclonal | 1:200    |
| Fluorescein (FITC) AffiniPure Donkey Anti-Goat IgG  | Jackson ImmunoResearch | 705-095-003 | Donkey monoclonal | 1:200    |
| Alexa Fluor 488 AffiniPure Donkey Anti-Goat IgG     | Jackson ImmunoResearch | 705-545-003 | Donkey monoclonal | 1:200    |

**Supplemental Table 2. Primers for quantitative RT-PCR.**

| <b>Standard gene name</b> | <b>Forward 5'-3'</b>     | <b>Reverse 5'-3'</b>          |
|---------------------------|--------------------------|-------------------------------|
| OCT4                      | CAGTGCCCGAAACCCACAC      | GGAGACCCAGCAGCCTCAAA          |
| Nanog                     | TACCTCAGCCTCCAGCAGAT     | CTTCTGCGTCACACCATTGC          |
| SOX2                      | TGGACAGTTACGCGCACAT      | CGAGTAGGACATGCTGTAGG<br>T     |
| Brachyury                 | TGCTTCCCTGAGACCCAGT<br>T | GATCACTTCTTTCCTTTGCAT<br>CAAG |
| MESP1                     | GAAGTGGTTCCTTGGCAGAC     | TCCTGCTTGCCTCAAAGTGT          |
| GATA4                     | TGCCGTTTCATCTTGTGGTAG    | CCGACACCCCAATCTCG             |
| NKX2.5                    | CAAGTGTGCGTCTGCCTTT      | CAGCTCTTTCTTTTCGGCTCT<br>A    |

**Supplemental Table 3.** The mapping quality of bulk-RNAseq data (12 samples of <sup>A</sup>iPSC, <sup>V</sup>iPSC, <sup>A</sup>iPSC-CM, and <sup>V</sup>iPSC-CM groups) was reported by the STAR pipeline.

**Supplemental Table 4:** the data origin and characteristics of the iPSC and iPSC-CM cell lines, in which Bulk-RNAseq data were integrated and analyzed.

**Supplemental Table 5:** The statistics of 1081 differentially expressed genes comparing between cardiac-tissue-derived iPSC-CM (<sup>A</sup>iPSC-CM/<sup>V</sup>iPSC-CM) and skin-tissue-derived iPSC-CM (<sup>S-D30</sup>iPSC-CM/<sup>S-D90</sup>iPSC-CM). Deseq2 pipeline was used to normalize gene expression. For statistical significance, the fold-change and non-parametric tests were applied.

**Supplemental Table 6:** The statistics of 124 differentially expressed genes comparing between <sup>A</sup>iPSC-CM and <sup>V</sup>iPSC-CM. The gene expression was normalized using Deseq2 pipeline, then fold-change and non-parametric tests was applied for statistical significance.
